# Supplementary material for: Biomarkers of Depression among Adolescent Girls: BDNF and Epigenetics
Source: MDPI journal article supplement (doi:10.3390/ijms25063281), 2024-03-14
Supplement: s1 [file s1]

**Table S1. Description of the primers**

| Primer version 1                                                                                                                                                                                                                                                                                                                                                                                                                                                 | Primer version 2                                                                                                                                                                                                                                                                                                                                                                                                                                                                                                                                                                                                                         |
|------------------------------------------------------------------------------------------------------------------------------------------------------------------------------------------------------------------------------------------------------------------------------------------------------------------------------------------------------------------------------------------------------------------------------------------------------------------|------------------------------------------------------------------------------------------------------------------------------------------------------------------------------------------------------------------------------------------------------------------------------------------------------------------------------------------------------------------------------------------------------------------------------------------------------------------------------------------------------------------------------------------------------------------------------------------------------------------------------------------|
| Forward Primer for Methylated DNA (MF)                                                                                                                                                                                                                                                                                                                                                                                                                           |                                                                                                                                                                                                                                                                                                                                                                                                                                                                                                                                                                                                                                          |
| 5' AGCGAGAGTAGTTTTTTTCGC 3'                                                                                                                                                                                                                                                                                                                                                                                                                                      | 5' TGTATGGCGGAGGTAATATTC 3'                                                                                                                                                                                                                                                                                                                                                                                                                                                                                                                                                                                                              |
| Reverse Primer for Methylated DNA (MR)                                                                                                                                                                                                                                                                                                                                                                                                                           |                                                                                                                                                                                                                                                                                                                                                                                                                                                                                                                                                                                                                                          |
| 5' CATATAACAACGCACGTCAAA 3'                                                                                                                                                                                                                                                                                                                                                                                                                                      | 5' AAACACTCTCTCGCTACCGCT 3'                                                                                                                                                                                                                                                                                                                                                                                                                                                                                                                                                                                                              |
| Forward Primer for Unmethylated DNA (UF)                                                                                                                                                                                                                                                                                                                                                                                                                         |                                                                                                                                                                                                                                                                                                                                                                                                                                                                                                                                                                                                                                          |
| 5' GGTAGTGAGAGTAGTTTTTTTGT 3'                                                                                                                                                                                                                                                                                                                                                                                                                                    | 5' ATTGTATGGTGGAGGTAATATTT 3'                                                                                                                                                                                                                                                                                                                                                                                                                                                                                                                                                                                                            |
| Reverse Primer for Unmethylated DNA (UR)                                                                                                                                                                                                                                                                                                                                                                                                                         |                                                                                                                                                                                                                                                                                                                                                                                                                                                                                                                                                                                                                                          |
| 5' TCATATAACAACACACATCAAAAC 3'                                                                                                                                                                                                                                                                                                                                                                                                                                   | 5' AAAAACTACTCTCACTACCACT 3'                                                                                                                                                                                                                                                                                                                                                                                                                                                                                                                                                                                                             |
| Promoter sequence region                                                                                                                                                                                                                                                                                                                                                                                                                                         |                                                                                                                                                                                                                                                                                                                                                                                                                                                                                                                                                                                                                                          |
| >ref NC_000011.9 :27723083-27723477 Homo sapiens chromosome 11, GRCh37.p13 Primary Assembly                                                                                                                                                                                                                                                                                                                                                                      | >ref NC_000011.9 :27722850-27723394 Homo sapiens chromosome 11, GRCh37.p13 Primary Assembly                                                                                                                                                                                                                                                                                                                                                                                                                                                                                                                                              |
| gDNA Sequence                                                                                                                                                                                                                                                                                                                                                                                                                                                    |                                                                                                                                                                                                                                                                                                                                                                                                                                                                                                                                                                                                                                          |
| 5'<br>TCCATTTGATCTCGGCAGAGGCAGGGAGATTTC<br>ATGCTAGTTCGCCGGGGGAGCGGCAGCGAGA<br>GCAGCCCTCTCCGCGGTGAATGGGAAAGTGGGT<br>GGGAGTCCACGAGAGGGCTCCACGGTGCCTTG<br>ACGTGCGCTGTGCATATGATACCTCCGCTGCCTC<br>GAAATAGACACTCTAGTGCACGAATTACCAGA<br>ATCAAAATTCAGCGCATTTAAAATGATACATCT<br>TTTATTAGAAGAGTTCGGTCCAGGGCATTGCA<br>GCTTTTGAGATGTTTTCACTCCAGCCCCAGCA<br>AACACACGTATAAGCTAACCCCTTTAATAACGA<br>ACCAGGGCAGCCAAGATAAATAAAAAGTCTTC<br>TGCTTTAACCAGAGTGGGGGTAGGTGATTCGAG<br>G 3' | 5'<br>AGTCACTACTTGTCAAAGTAACCATCAAGGCAGC<br>TGCTCCGGGAAAGACTTCGGCCCCAAAACCTCCA<br>CACTCTATTATTTTTTACGTTCCCTTCGCTTAATT<br>AAAGGGGGGAGGGGGCGCGAGTCTTTGGTGCCC<br>GGTATGTACTCCTTCTGTTCTGCAGCAAAGAAGTT<br>AAATTATTGATAGTGGAAATTGCATGGCGGAGGT<br>AATACTCGCACCCCATCAGCGAGAAGCTCCATTT<br>GATCTCGGCAGAGGCAGGGAGATTTTCATGCTAGT<br>TCGCCGGGGGAGCGGCAGCGAGAGCAGCCCTC<br>TCCGCGGTGAATGGGAAAGTGGGTGGGAGTCCA<br>CGAGAGGGCTCCACGGTGCCTTGACGTGCGCTGT<br>CATATGATACCTCCGCTGCCTCGAAATAGACACT<br>CTAGTGCACGAATTACCAGAATCAAAATTCAGCG<br>CATTTAAAATGATACATCTTTTATTAGAAGAGTTC<br>CGTTCCAGGGCATTGCATGCTTTTGCAGATGTTTT<br>CACTTCCAGCCCCAGCAAACACACGTATAAGCT<br>3' |
| Bisulfite modification of DNA                                                                                                                                                                                                                                                                                                                                                                                                                                    |                                                                                                                                                                                                                                                                                                                                                                                                                                                                                                                                                                                                                                          |
| 5' TTTATTGATTTCGGTAGAGGTAGGGAGATTTT<br>ATGTTAGTTCGTCGGGGGAGCGGTAGCGAGAG<br>TAGTTTTTTTCGCGGTGAATGGGAAAGTGGGTG<br>GGAGTTTACGAGAGGGTTTTACGGTGTTTTGAC<br>GTGCGTTGTTATATGATATTTTCGTTGTTTCGAA<br>ATAGATATTTTAGTGTACGAATTATTAGAATTAA<br>AATTTAGCGTATTTAAAATGATATATTTTTTATT<br>AGAAGAGTTTCGTTTTAGGGTATTGTATGTTTTT<br>GTAGATGTTTTATTTTTAGTTTTAGTAAATATAC<br>GTATAAGTTAATTTTTTAATAACGAATTAGGGT<br>AGTTAAGATAAATAAAAAGTTTTTTGTTTTAATT<br>AGAGTGGGGGTAGGTGATTCGAGG 3'        | 5'<br>AGTTATTATTTGTTAAAGTAATTATTAAGGTAGTT<br>GTTTCGGGAAAGATTTTCGGTTTTTAAAATTTTATA<br>TTTTATTATTTTTTACGTTTTTTTCGTTTAAATAAA<br>GGGGGGAGGGGGCGCGAGTTTTTGGTGTTCCGGTA<br>TGTATTTTTTTGTTTTGTAGTAAAGAAGTTAAATT<br>ATTGATAGTGGAATTTGTATGGCGGAGGTAATAT<br>TCGTATTTTATTAGCGAGAAGTTTTATTGATTTCG<br>GTAGAGGTAGGGAGATTTTATGTTAGTTCGTCGG<br>GGGGAGCGGTAGCGAGAGTAGTTTTTTTCGCGGT<br>GAATGGGAAAGTGGGTGGGAGTTTACGAGAGGG<br>TTTTACGGTGTTTTGACGTGCGTTGTTATATGATAT<br>TTTCGTTGTTTCGAAATAGATATTTTATGTGACGA<br>ATTATTAGAATTAATAATTTAGCGTATTTAAAATGA<br>TATATTTTTTATTAGAAGAGTTTCGTTTTAGGGTAT<br>TGTATGTTTTTGTAGATGTTTTTATTTTTAGTTTTAG<br>TAAATATACGTATAAGTT 3'   |

The primers were designed with Methyl Primer Express™ Software v1.0 (Applied Biosystems, USA)
